# Supplementary material
Source: PubMed Central journal article supplement (PMC6643056)
Supplement: NIHMS1518625-supplement-1.pdf [file NIHMS1518625-supplement-1.pdf]

## Supplemental Table S1

Differential diagnoses for patients with elevated basal serum tryptase levels

| Diagnosis                                                   | Most likely cellular origin of tryptase |
|-------------------------------------------------------------|-----------------------------------------|
| <b>Hematologic</b>                                          |                                         |
| Systemic mastocytosis                                       | Clonal MC                               |
| Myelomastocytic leukemia                                    | Myeloblasts, neoplastic MC              |
| Ph+ chronic myeloid leukemia                                | Clonal (immature) basophils             |
| Chronic basophilic leukemia                                 | Clonal (immature) basophils             |
| Acute basophilic leukemia                                   | Clonal (immature) basophils             |
| Acute myeloid leukemia                                      | Myeloblasts                             |
| Myelodysplastic syndrome (MDS)                              | Myeloblasts, basophils, MC              |
| Myeloproliferative neoplasm (MPN)                           | Myeloblasts, basophils, MC              |
| MPN/MDS overlap neoplasm                                    | Myeloblasts, basophils or MC            |
| FIP1L1/PDGFR $\alpha$ + chronic eosinophilic leukemia (CEL) | Clonal MC                               |
| <b>Reactive causes/conditions*</b>                          |                                         |
| Allergic diseases                                           | MC                                      |
| Chronic urticaria                                           | MC                                      |
| Chronic inflammatory diseases                               | MC                                      |
| Chronic helminth infection                                  | MC                                      |
| <b>Other Conditions</b>                                     |                                         |
| Familial alpha-tryptasemia                                  | MC, other cells?                        |
| Severe kidney disease (renal failure)                       | MC                                      |
| Normal healthy individual**                                 | MC                                      |
| False-positive test result***                               | -                                       |

\*Diseases within this category will often be accompanied by serum tryptase levels within the normal range. \*\*Occasional normal healthy individuals may have an elevated basal serum tryptase in the absence of known causes of an elevated tryptase and where the basis for the elevation is yet to be determined. \*\*\*A false-positive test result has been regarded as related to the presence of heterophilic antibodies in previous times. The new version of the tryptase test is considered to avoid this analytical problem. False positive assays in urine for histamine and its metabolites can be the result of bacterial contamination or diet. MC, mast cells.
